# Supplementary material for: A physico-chemo-electrochemically coupled stable interface for high-capacity and durable aqueous zinc metal batteries
Source: Royal Society of Chemistry journal article supplement (doi:10.1039/d3ta03501h), 2023-01-01
Supplement: d3ta03501h1.pdf [file d3ta03501h1.pdf]

## Supporting information

### **Physico-chemo-electrochemically coupled stable interface for high-capacity and durable aqueous zinc metal batteries**

*Gege Wang<sup>a,b</sup>, Feifan Zhang<sup>a,b</sup>, Caiyu Ma<sup>c</sup>, Jianhua Yang<sup>a</sup>, Xiaowei Chi<sup>a,\*</sup>, Yu Liu<sup>a,\*</sup>*

<sup>a</sup> Shanghai Institute of Ceramics, Chinese Academy of Sciences, Shanghai 200050, China

<sup>b</sup> University of Chinese Academy of Sciences, Beijing 100049, China

<sup>c</sup> School of Materials Science and Engineering, Shanghai University of Engineering Science, Shanghai 201620, China

\* Corresponding author. Email: xwchi@mail.sic.ac.cn

\* Corresponding author. Email: yuliu@mail.sic.ac.cn

The relationship between  $R_{ct}$  and the  $E_a$  follows the below Arrhenius equation:

$$\ln(R_{ct}^{-1}) = \ln A - E_a/RT$$

The  $E_a$  can be obtained by testing the temperature-dependent electrochemical impedance spectroscopy (EIS) of Zn//Zn symmetric cells. The EIS data for the cells with 2 M ZnSO<sub>4</sub> and 1% EMIMBF<sub>4</sub>-added 2 M ZnSO<sub>4</sub> electrolytes under various temperatures are shown Table S1 and Table S2, respectively.

**Table S1.** EIS spectra of the Zn//Zn symmetric cells in 2 M ZnSO<sub>4</sub> at different temperatures.

| Temperature<br>[°C] | Temperature<br>[K] | $R_{ct}$<br>[Ω] | $E_a$<br>[kJ mol <sup>-1</sup> ] |
|---------------------|--------------------|-----------------|----------------------------------|
| 30                  | 303.15             | 535.99          | -2.73                            |
| 40                  | 313.15             | 210.00          | -2.32                            |
| 50                  | 323.15             | 71.70           | -1.86                            |
| 60                  | 333.15             | 20.60           | -1.31                            |
| 70                  | 343.15             | 7.85            | -0.89                            |

**Table S2.** EIS spectra of the Zn//Zn symmetric cells in 2 M ZnSO<sub>4</sub>+1% EMIMBF<sub>4</sub> at different temperatures.

| Temperature<br>[°C] | Temperature<br>[K] | $R_{ct}$<br>[Ω] | $E_a$<br>[kJ mol <sup>-1</sup> ] |
|---------------------|--------------------|-----------------|----------------------------------|
| 30                  | 303.15             | 978.90          | -2.99                            |
| 40                  | 313.15             | 409.64          | -2.61                            |
| 50                  | 323.15             | 189.39          | -2.28                            |
| 60                  | 333.15             | 92.08           | -1.96                            |
| 70                  | 343.15             | 48.38           | -1.68                            |

**Table S3.** Comparison of the performance of Zn//Zn symmetric cells above a current density of 5 mA cm<sup>-2</sup> and above an areal capacity of 5 mAh cm<sup>-2</sup> with ionic liquid as additives in different research.

| Additive               | Current density<br>[mA cm <sup>-2</sup> ] | Areal capacity<br>[mAh cm <sup>-2</sup> ] | Cycle life<br>[h] | Cumulative areal capacity<br>[mAh cm <sup>-2</sup> ] |
|------------------------|-------------------------------------------|-------------------------------------------|-------------------|------------------------------------------------------|
| BMIM/ZTFO <sup>1</sup> | 5                                         | 25                                        | 100               | 1250                                                 |
| ImS/ZSO <sup>2</sup>   | 10                                        | 20                                        | 350               | 3600                                                 |
| PZIL <sup>3</sup>      | 8                                         | 8                                         | 300               | 1200                                                 |
| HMIM/ZSO <sup>4</sup>  | 8                                         | 8                                         | 250               | 1000                                                 |
| PVIPS-1 <sup>5</sup>   | 7.5                                       | 7.5                                       | 400               | 1500                                                 |
| PVIPS-2 <sup>5</sup>   | 5                                         | 5                                         | 500               | 1250                                                 |
| This work              | 5                                         | 5                                         | 1200              | 3000                                                 |

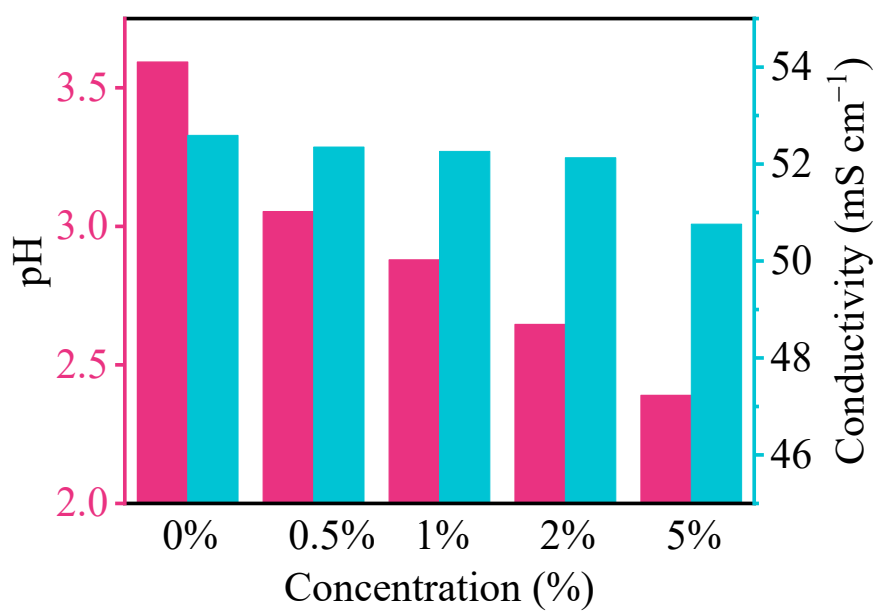

**Figure S1.** pH and conductivity of the electrolytes containing different concentrations of EMIMBF<sub>4</sub> (0%, 0.5%, 1%, 2% and 5%) additive.

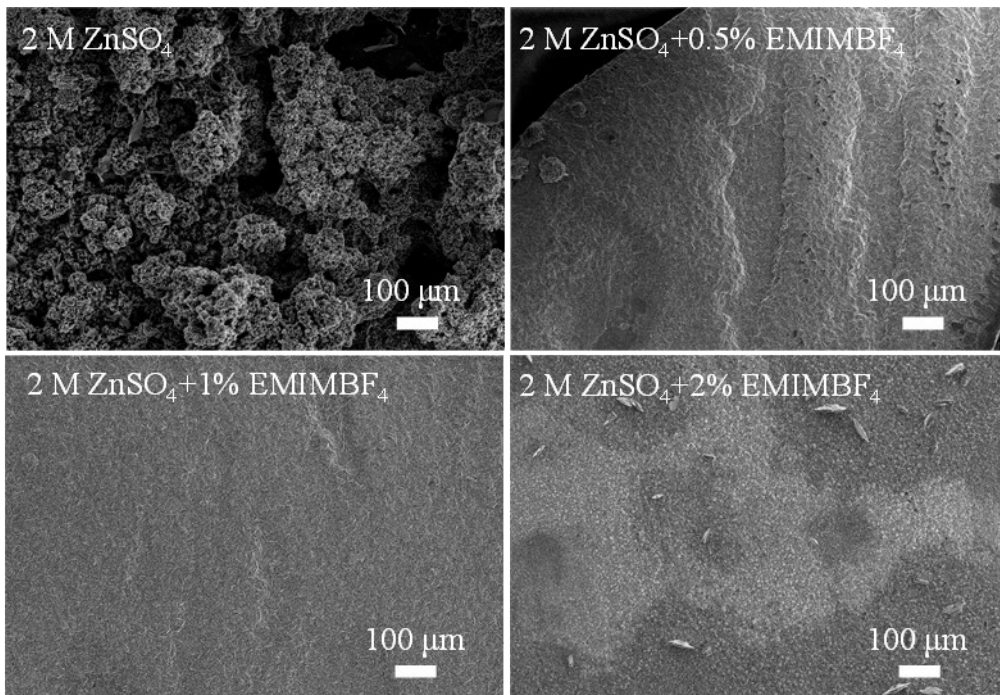

**Figure S2.** SEM images of the zinc electrode cycled in different electrolytes containing a series of concentrations of EMIMBF<sub>4</sub> (0%, 0.5%, 1% and 2%) additive.

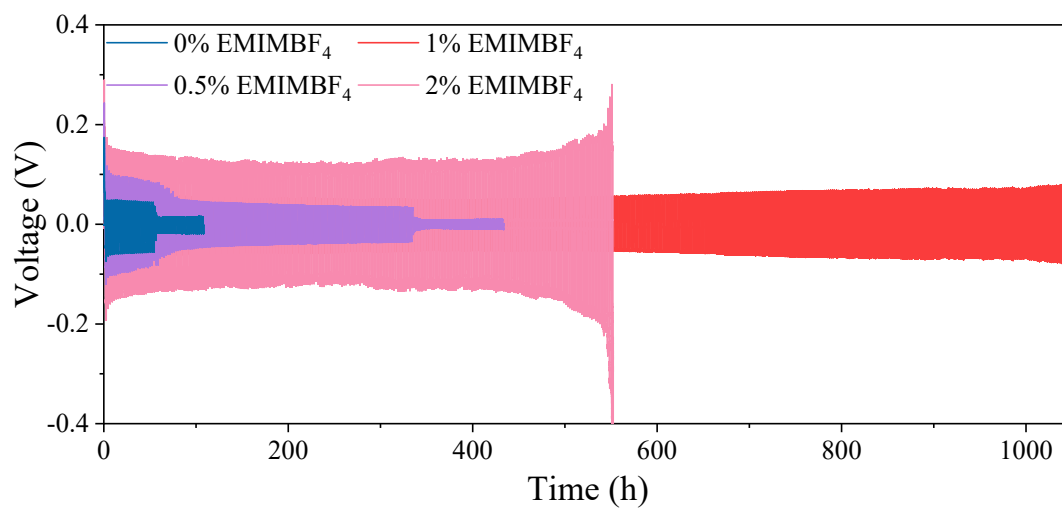

**Figure S3.** Voltage profiles of Zn//Zn symmetric cells with different electrolytes cycled at  $5 \text{ mA cm}^{-2}$  and  $5 \text{ mAh cm}^{-2}$ .

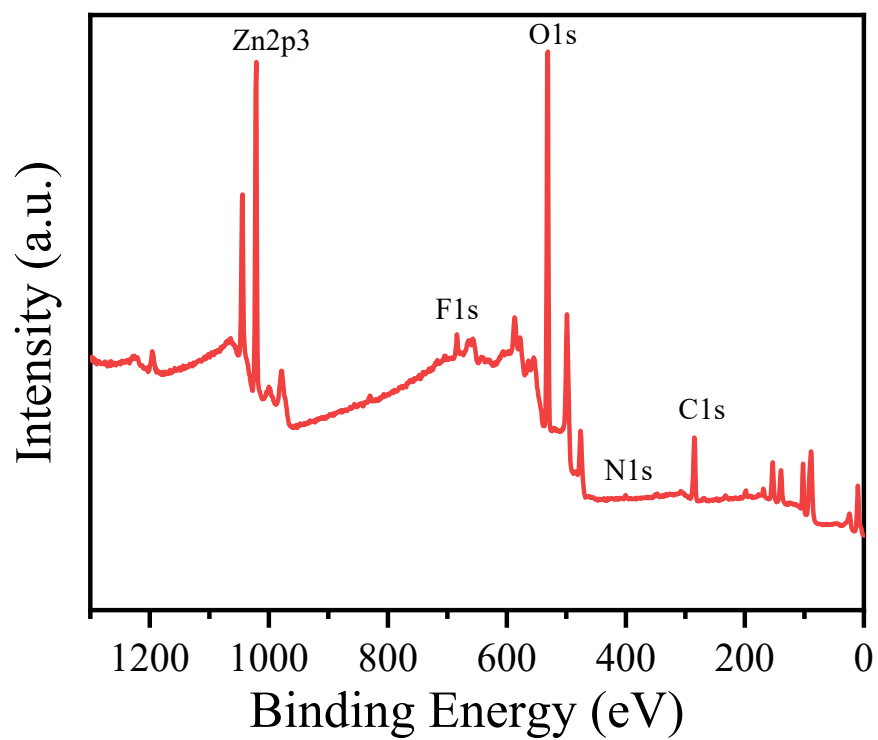

**Figure S4.** XPS survey spectrum of the cycled Zn electrode at  $5 \text{ mA cm}^{-2}$  and areal capacity of  $5 \text{ mAh cm}^{-2}$  after 50 cycles.

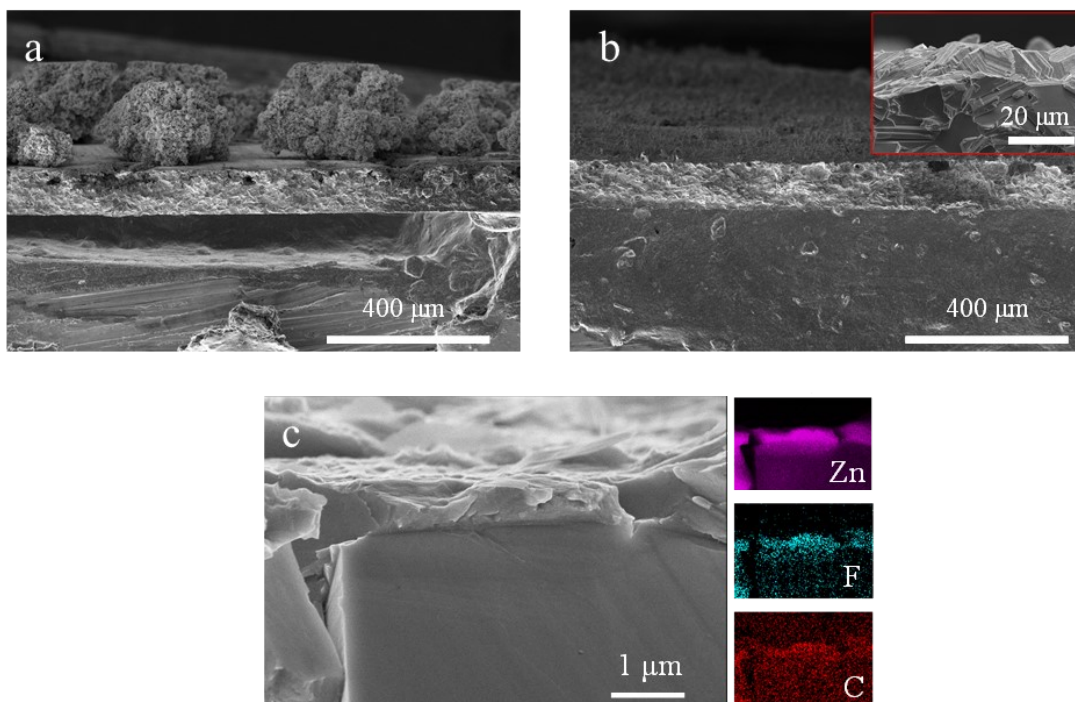

**Figure S5.** Cross-sectional SEM of the zinc electrode cycled in electrolyte (a) without and (b) with EMIMBF<sub>4</sub>. (c) EDS images of the Zn electrode cycled in Zn//Zn symmetric cells at 5 mA cm<sup>-2</sup> and 5 mAh cm<sup>-2</sup> for 24 h.



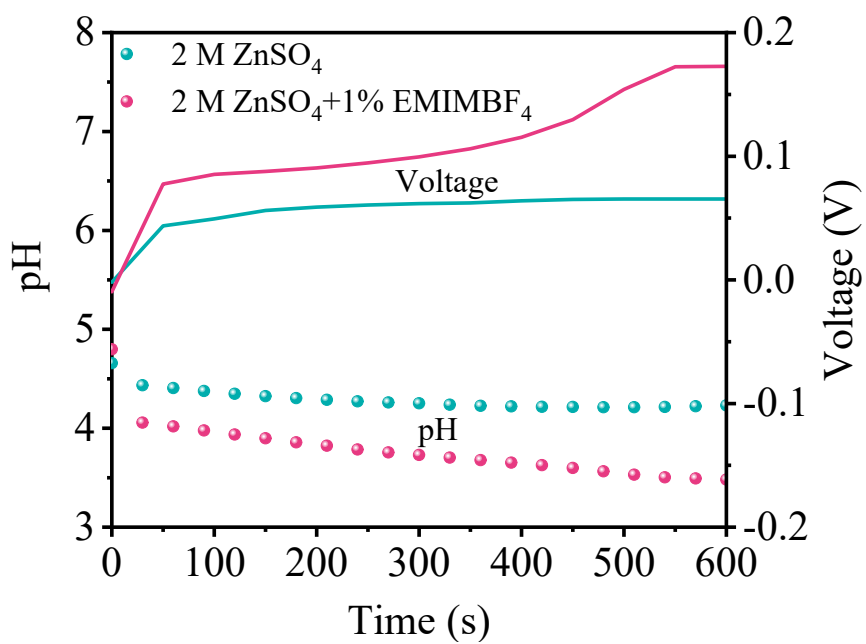

**Figure S6.** In-situ monitoring of the pH close to the Zn electrode surface during stripping.

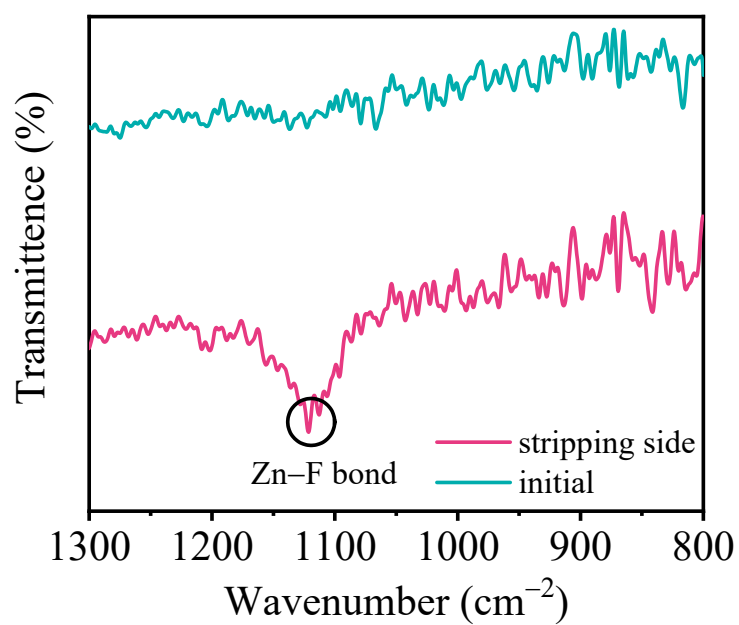

**Figure S7.** FTIR spectrum of the initial Zn foil and the Zn foil surface after stripping in the EMIMBF<sub>4</sub>-added electrolyte.

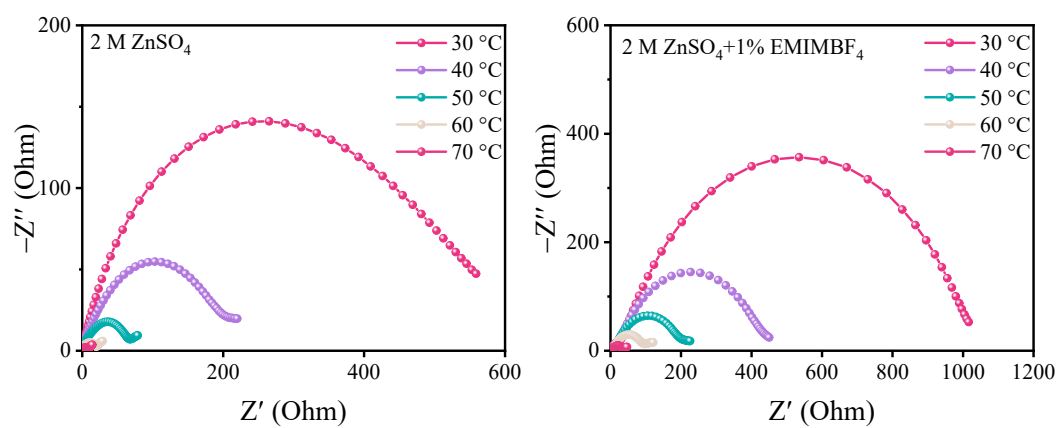

**Figure S8.** EIS spectra of the Zn//Zn symmetric cells at different temperatures in (a) 2 M  $ZnSO_4$  and (b) 2 M  $ZnSO_4$ +1% EMIMBF<sub>4</sub>.

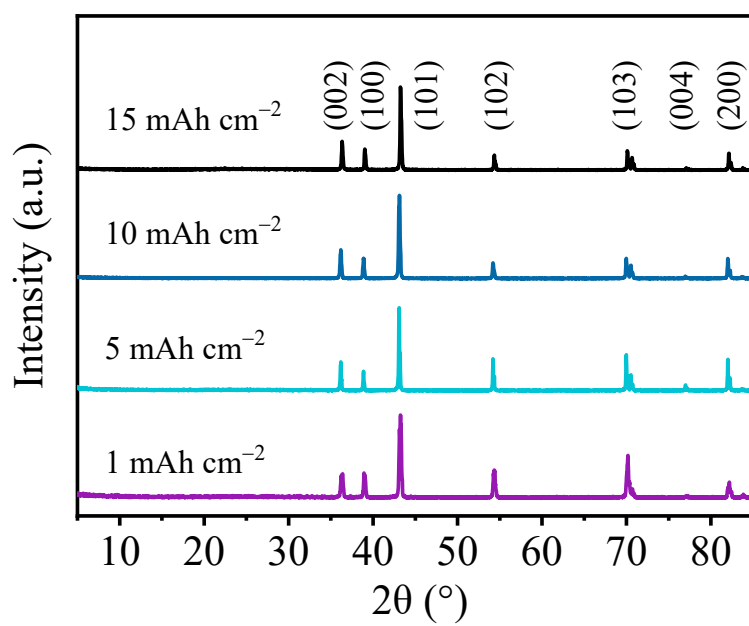

**Figure S9.** XRD patterns of different accumulative cycling capacity of zinc electrode under 5 mA cm<sup>-2</sup> in 2 M ZnSO<sub>4</sub>.

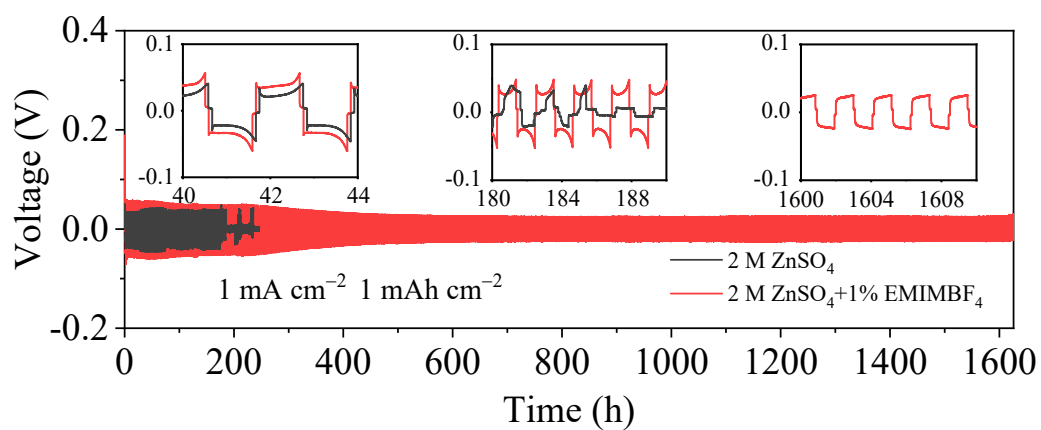

**Figure S10.** Long-term galvanostatic cycling of Zn//Zn symmetric cells with different electrolytes at  $1 \text{ mA cm}^{-2}$  and  $1 \text{ mAh cm}^{-2}$ .

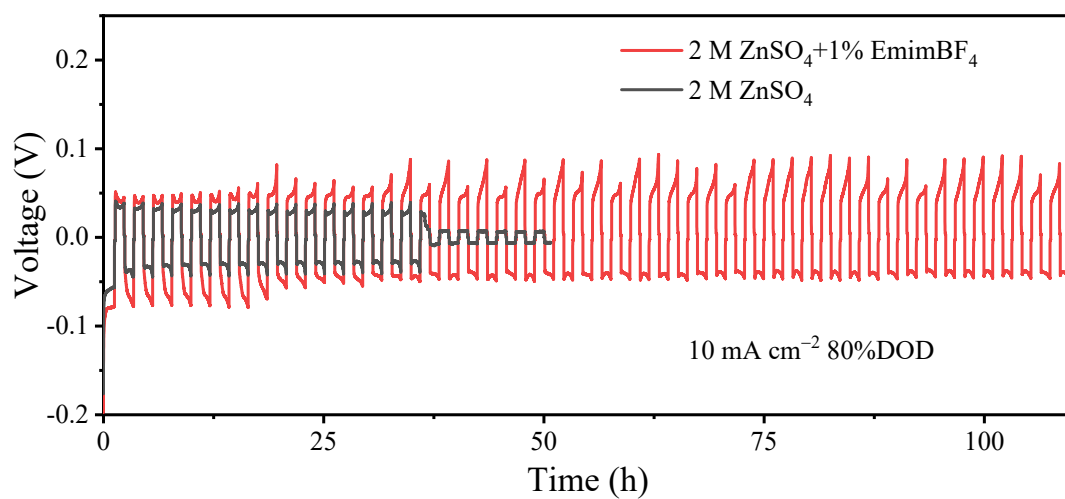

**Figure S11.** Galvanostatic cycling of Zn//Zn symmetric cells at 10 mA cm<sup>-2</sup> and 80% DOD.

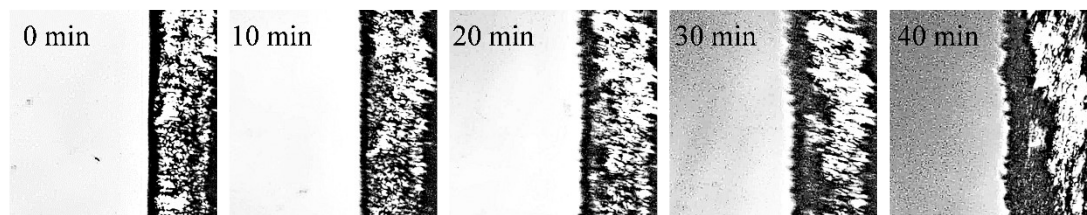

**Plating**

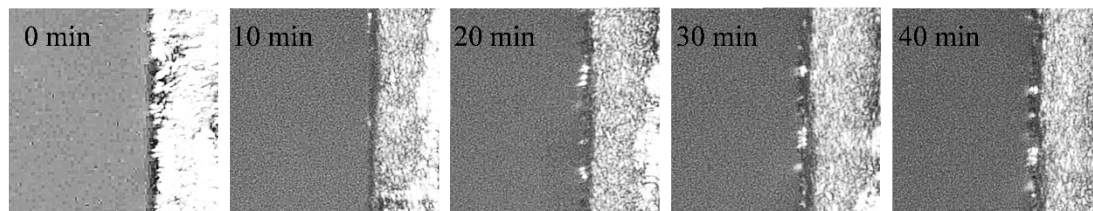

**Figure S12.** In-situ optical microscopic images of the evolution of the Zn deposition process zinc on a copper under a current density of  $5 \text{ mA cm}^{-2}$  from 0 min to 40 min.

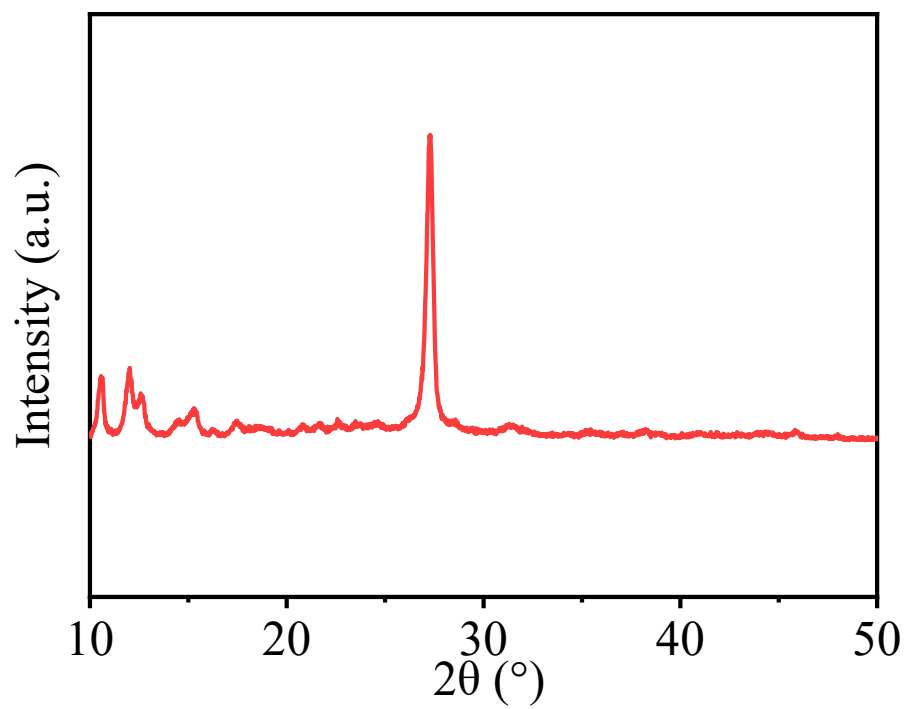

**Figure S13.** XRD pattern of HATNQ cathode powder.



## References

- 1 J. Chen, W. Zhou, Y. Quan, B. Liu, M. Yang, M. Chen, X. Han, X. Xu, P. Zhang and S. Shi, *Energy Storage Materials*, 2022, **53**, 629–637.
- 2 Y. Lv, M. Zhao, Y. Du, Y. Kang, Y. Xiao and S. Chen, *Energy Environ. Sci.*, 2022, **15**, 4748–4760.
- 3 R. Chen, Q. Liu, L. Xu, X. Zuo, F. Liu, J. Zhang, X. Zhou and L. Mai, *ACS Energy Lett.*, 2022, **7**, 1719–1727.
- 4 C. Wu, C. Sun, K. Ren, F. Yang, Y. Du, X. Gu, Q. Wang and C. Lai, *Chemical Engineering Journal*, 2023, **452**, 139465.
- 5 Y. Hao, D. Feng, L. Hou, T. Li, Y. Jiao and P. Wu, *Advanced Science*, 2022, **9**, 2104832.
